# Supplementary material for: Transcriptomic Analysis of Inbred Chicken Lines Reveals Infectious Bursal Disease Severity Is Associated with Greater Bursal Inflammation In Vivo and More Rapid Induction of Pro-Inflammatory Responses in Primary Bursal Cells Stimulated Ex Vivo
Source: MDPI journal article supplement (doi:10.3390/v13050933), 2021-05-18
Supplement: s1 [file s1]

**Table S5.** Primers used in this study.

| <b>Name</b>  | <b>Forward Sequence<br/>(5'-3')</b> | <b>Reverse Sequence<br/>(5'-3')</b> |
|--------------|-------------------------------------|-------------------------------------|
| IBDV         | GAGGTGGCCGACCTCAACT                 | GCCCGGATTATGTCTTTGAAG               |
| IL-1 $\beta$ | GCTCTACATGTCGTGTGATGAG              | TGTCGATGTCCCGCATGA                  |
| IL-6         | AACATGCGTCAGCTCCTGAAT               | TCTGCTAGGACTTCTCCATTGAA             |
| IL-8         | GCCCTCCTCCTGGTTTCAG                 | TGGCACCGCAGCTCATT                   |
| iNOS         | CCTGGAGGTCCTGGAAGAGT                | CCTGGGTTTCAGAAGTGGC                 |
